# Supplementary material
Source: publisher figshare collection journal article supplement (https://gsajournals.figshare.com/articles/dataset/_/8069438)
Supplement: Supplementary file 1 [file 1]

**Table S1.** *S. carpocapsae* scaffolds' size and their respective number of genes.

| <b>Scaffolds names</b> | <b>Size (bp)</b> | <b>Number of genes</b> |
|------------------------|------------------|------------------------|
| Chromosome X           | 20,922,283       | 6,776                  |
| Scaffold 1             | 10,667,315       | 4,178                  |
| Scaffold 2             | 7,849,269        | 2,985                  |
| Scaffold 3             | 7,362,381        | 2,988                  |
| Scaffold 4             | 6,281,995        | 2,258                  |
| Scaffold 5             | 5,918,336        | 2,075                  |
| Scaffold 6             | 4,503,743        | 1,813                  |
| Scaffold 7             | 4,445,334        | 1,594                  |
| Scaffold 8             | 4,020,605        | 1,373                  |
| Scaffold 9             | 3,654,988        | 1,471                  |
| Scaffold 10            | 3,583,767        | 1,503                  |
| Scaffold 11            | 1,806,464        | 724                    |
| Scaffold 12            | 1,744,715        | 588                    |
| Scaffold 13            | 1,168,849        | 426                    |
| Scaffold 14            | 375,282          | 133                    |
| Scaffold 15            | 207,283          | 72                     |
