# Supplementary material
Source: publisher figshare collection journal article supplement (https://gsajournals.figshare.com/articles/dataset/_/8069438)
Supplement: Supplementary file 2 [file 1]

**Table S2.** Orthologs of *C. elegans* sex determination genes in *S. carpocapsae*.

| <i>C. elegans</i> gene ID | <i>C. elegans</i> wormbase gene ID | <i>S. carpocapsae</i> one:one ortholog | <i>S. carpocapsae</i> 1:many orthologs              |
|---------------------------|------------------------------------|----------------------------------------|-----------------------------------------------------|
| <i>fem-1</i>              | WBGene00001411                     | g4309                                  | N/A                                                 |
| <i>fem-2</i>              | WBGene00001412                     | g19092                                 | N/A                                                 |
| <i>fox-1</i>              | WBGene00001484                     | g3758                                  | N/A                                                 |
| <i>laf-1</i>              | WBGene00002244                     | g15046                                 | N/A                                                 |
| <i>mab-3</i>              | WBGene00003100                     | g6785                                  | N/A                                                 |
| <i>mag-1</i>              | WBGene00003123                     | g26993                                 | N/A                                                 |
| <i>sea-2</i>              | WBGene00004751                     | g2451                                  | N/A                                                 |
| <i>sel-10</i>             | WBGene00004767                     | g28368                                 | N/A                                                 |
| <i>sex-1</i>              | WBGene00004786                     | g4210                                  | N/A                                                 |
| <i>fog-1</i>              | WBGene00001481                     | g4059                                  | N/A                                                 |
| <i>tra-3</i>              | WBGene00006606                     | g14457                                 | N/A                                                 |
| <i>sdc-1</i>              | WBGene00004745                     | N/A                                    | g22247, g22250, g29699 <sup>a</sup>                 |
| <i>her-1</i>              | WBGene00001842                     | N/A                                    | g22333, g27950 <sup>a</sup> , g27951                |
| <i>fem-3</i>              | WBGene00001413                     | N/A                                    | g30442, g4428 <sup>a</sup>                          |
| <i>mog-1</i>              | WBGene00003389                     | N/A                                    | g12209, g18311 <sup>a</sup> , g18624, g24051, g2524 |
| <i>tra-1</i>              | WBGene00006604                     | N/A                                    | g4428 <sup>a</sup> , g30442                         |
| <i>gld-1</i>              | WBGene00001595                     | N/A                                    | g731 <sup>a</sup> , g709, g16329, g16349, g16347    |
| <i>mog-4</i>              | WBGene00003392                     | N/A                                    | g12209, g18311, g18624, g24051, g2524 <sup>a</sup>  |
| <i>mog-5</i>              | WBGene00003393                     |                                        |                                                     |
| <i>fbf-1</i>              | WBGene00001401                     | g11152                                 | N/A                                                 |
| <i>fbf-2</i>              | WBGene00001402                     |                                        |                                                     |
| <i>fog-2</i>              | WBGene00001482                     | N/A                                    | N/A                                                 |
| <i>fog-3</i>              | WBGene00001483                     | N/A                                    | N/A                                                 |
| <i>nos-3</i>              | WBGene00003785                     | N/A                                    | N/A                                                 |
| <i>sdc-2</i>              | WBGene00004746                     | N/A                                    | N/A                                                 |
| <i>sdc-3</i>              | WBGene00004747                     | N/A                                    | N/A                                                 |
| <i>tra-2</i>              | WBGene00006605                     | N/A                                    | N/A                                                 |
| <i>xol-1</i>              | WBGene00006962                     | N/A                                    | N/A                                                 |

a. Best match according to phylogenetic analysis
